# Supplementary material
Source: publisher figshare collection journal article supplement (https://future-science-group.figshare.com/articles/dataset/_/22348513)
Supplement: Supplementary file 1 [file 1]

**Supporting Information**

**Cascade Biomimetic Intelligent Nanotheranostic Agents for Imaging Guiding Tumor Synergistic Therapy**

Zhengzou Fang,1* Ziyu Zhu,2* Zijian zhuang,1 Zhangzuo Li,1 Cheng Yan,3 Mengting Yang,1 Qian Chen,1 Xinyuan Li,2 Aihua Gong1

1. Hematological Disease Institute of Jiangsu University, Affiliated Hospital of Jiangsu University, Zhenjiang, 212001, China.
2. The Affiliated Huai’an Hospital of Xuzhou Medical University and The Second People’s Hospital of Huai’an, No. 62, Huaihai Road (S.), Huai’an 223002, China.
3. Nanjing Jiangning Hospital, Department of Blood Transfusion, the Affiliated Jiangning Hospital of Nanjing Medical University, Nanjing, 211100, China.

[*] These authors contributed equally to this work.

[Corresponding author](javascript:;): Aihua Gong

Email: y13852034764@163.com

**Experimental section**

**Materials and Reagents**

Dichloromethane and KMnO4 were purchased from Sinopharm Chemical Reagent (Beijing, China). 1,2-distearoyl-sn-glycero-3-phosphoethanolamine-N-[folate (polyethylene glycol)-2000] (DSPE-PEG-FA), indocyanine green (ICG), doxorubicin (DOX), 4’,6-diamidino-2-phenylindole (DAPI), glutathione (GSH, reduced), [Ru(dpp)3]Cl2 (RDPP), 1, 3-diphenylisobenzofuran (DPBF), 2′, 7′-dichlorofluorescein diacetate (DCFH-DA), cell counting kit-8 (CCK-8) and formic acid were bought from Aladdin (Shanghai, China). Mowiol®PVA-105 (PVA) and Poly(L-lactide-co-glycolide) (PLGA, 50:50 (MW=24000-38000)) were purchased from Sigma (USA). Fetal bovine serum (FBS), 1640 medium and dulbecco’s modified eagle medium (DMEM) were purchased from Gibco (Shanghai, China). All chemicals are used without further purification.

**Apparatus and Procedures**

Transmission electron microscope (TEM) images were captured by transmission electron microscope (JEOL 2100, Japan). X-ray diffraction (XRD) measurement is made by X-ray diffractometer (GBC MMA instrument). Fourier transform infrared (FTIR) spectroscopy was carried out by NicoletNexus 470 spectrometer (USA). The Raman spectra is obtained by Perkin-Elmer Raman spectrometer (Horiba evolution) at 532 nm with a diode laser operating system. Fluorescence spectra is collected from a FluoroMax-4 spectrofluorometer (Japan). The transverse relaxation times (*T1*) of Mn are measured by 3.0 T clinical magnetic resonance imaging (MRI) scanner (GE Echospeed Signa, USA). UV–vis absorption spectra was measured by a Cary100 UV–vis spectrophotometer (USA). The infrared thermal camera (HT-19, Guangzhou, China) was utilized to take the infrared thermal photos and record the temperature changes. The irradiance at 808 nm was measured via a fiber-coupled NIR laser (MDL-N-808 nm-10W, Beijing Laserwave OptoElectronics Technology Co., Ltd., Beijing, China). Confocal laser scanning microscope (CLSM, Nikon, Japan) was performed to analyze the cell uptake behavior.

**Synthesis of MnO2-GO/DOX&ICG**

MnO2-GOOX&ICG nanoplatform was prepared after adding GO, DOX and ICG into PVA (1% wt) solution, following by sonication for 30 min and stirring for 1 h. Then, PLGA (20 mg) was added into dichloromethane (1 mL), and slowly dropped into the above mixed solution, and stirring them at 1000 rpm for 5 h. The obtained products were washed with PBS for three times, and immersed into the KMnO4 solution (1 mg/mL) to continue stirring for another 1 h. The obtained MnO2-GO/DOX&ICG nanoplatform were washed three times with PBS solution and dried with a vacuum freeze dryer [1,2].

***In vitro* drug release**

Drug release behavior of FA-EM@MnO2-GO/DOX&ICG nanoplatform in different solution [PBS (pH = 7.4), and simulated TME (pH = 5.5, 10 mM GSH and 30 μM H2O2)] were investigated by dialyzing with dialysis bags at 37 ℃ with shaking at 300 rpm. At designed time points, the drugs releasing from FA-EM@MnO2-GO/DOX&ICG nanoplatform was recorded by UV-vis spectra [3,4].

***In vitro* cytotoxicity**

GES-1 cells and 4T1 cells (3×104) were seeded into the 96-well plate, and incubated in 5% CO2 at 37 ℃ incubator for 12 h, then the medium was discarded and replaced with fresh medium containing different materials (free medium, FA-EM@DOX&ICG, MnO2-GO/DOX&ICG and FA-EM@MnO2-GO/DOX&ICG). After being incubated for 4 hours, cells were treated with NIR irradiation for 10 min at the power of 1.5 W/cm2 anduntreated cells was set as control. Then, cells were incubated for another 12 hours and the medium was discarded before CCK-8 solution (100 μL) was added into each well. Finally, cell viability was tested with 450 nm enzyme microplate reader (Bio Tek, Winooski, VT, USA) [5].

**Animal welfare**

All animal experiments are carried out according to the animal protection regulations by the Animal Care Rules and Use Committee of Jiangsu University. 7-week-old BALB/c mice were purchased from Jiangsu University (Zhenjiang, People's Republic of China) and fed in a specific pathogen - free condition. All efforts are made to reduce the suffering of animals and the frequency of their use.


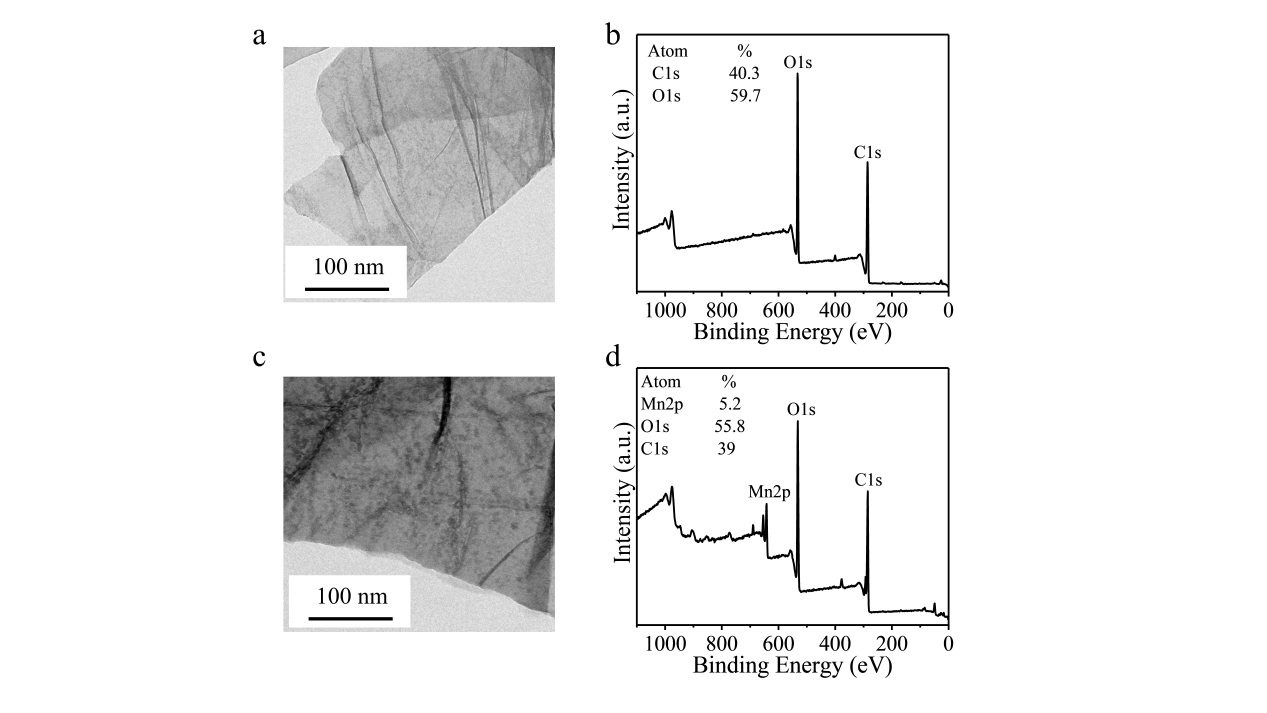


**Figure S1.** (a) TEM imaging of GO/ICG&DOX nanoplatform. (b) Narrow XPS scan spectra of GO/ICG&DOX nanoplatform. (c) TEM imaging of MnO2-GO/ICG&DOX nanoplatform. (b) Narrow XPS scan spectra of MnO2-GO/ICG&DOX nanoplatform.


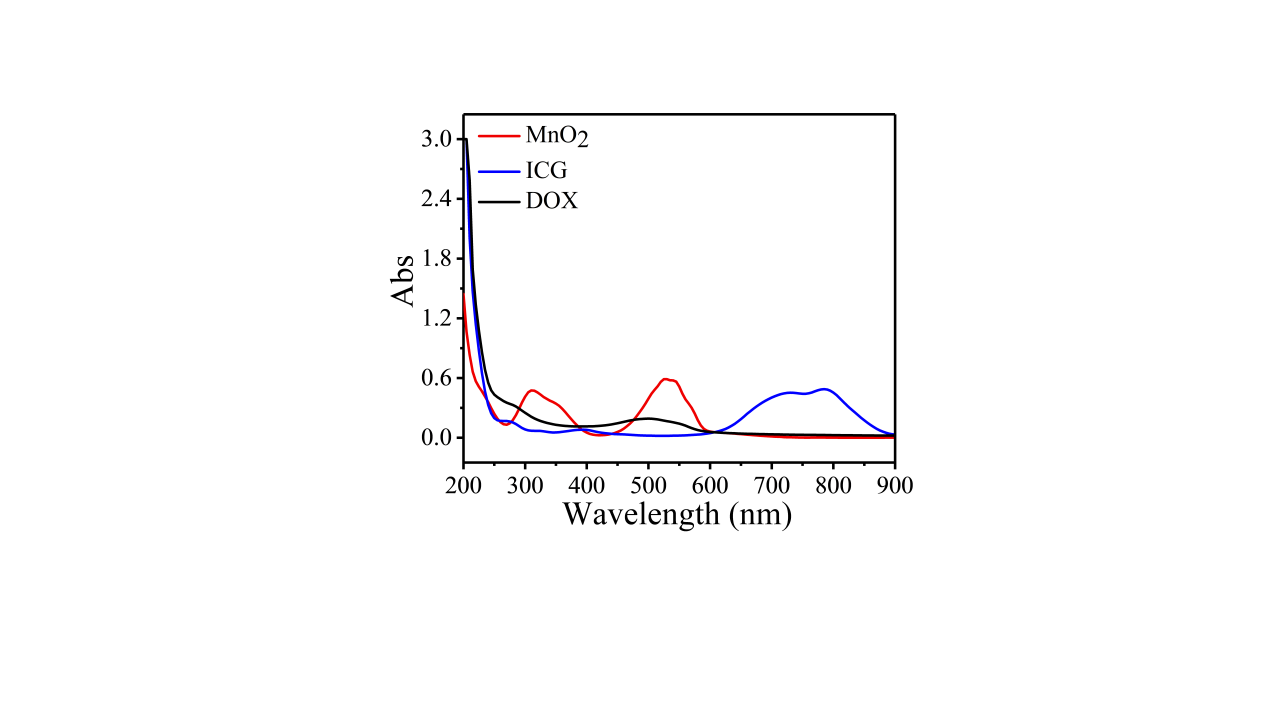


**Figure S2.** UV absorption spectra of MnO2, ICG, and DOX.

**
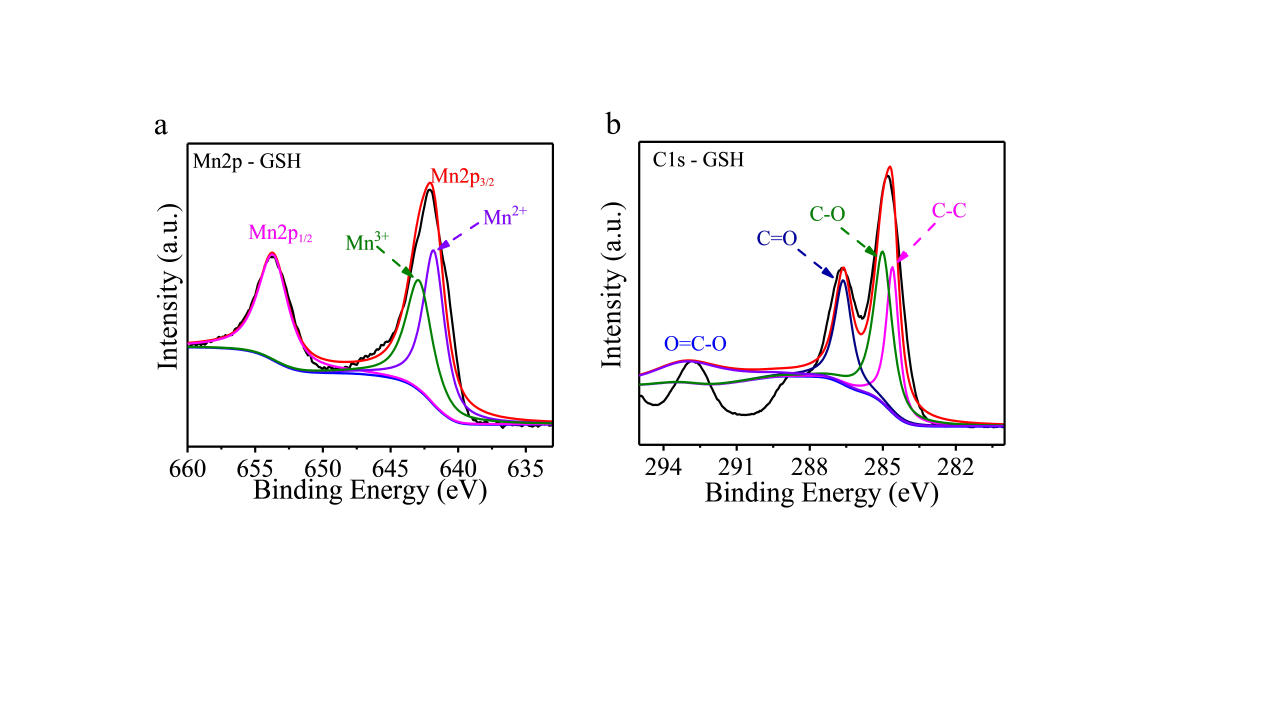
**

**Figure S3.** Narrow XPS scan spectra of (a) Mn2p in FA-EM@MnO2-GO/ICG&DOX and (b) C1s in FA-EM@MnO2-GO/ICG&DOX.


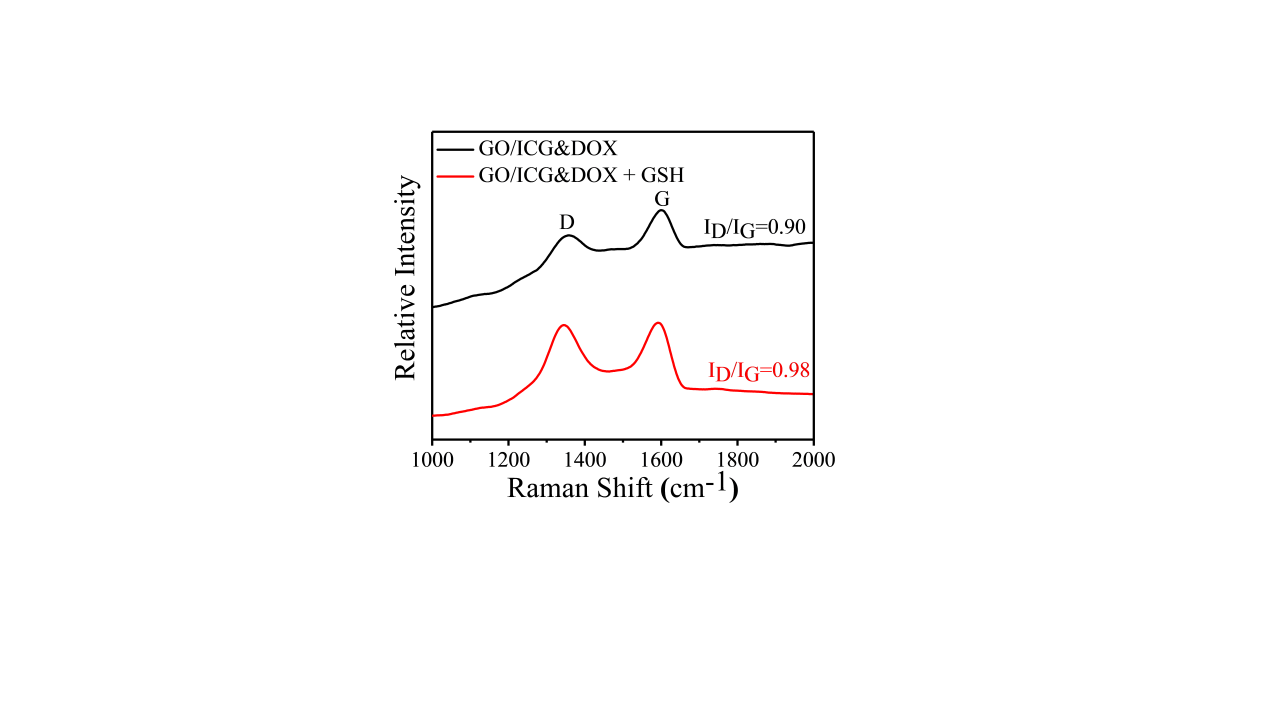


**Figure S4.** Raman spectra of GO/ICG&DOX and GO/ICG&DOX + GSH.

**
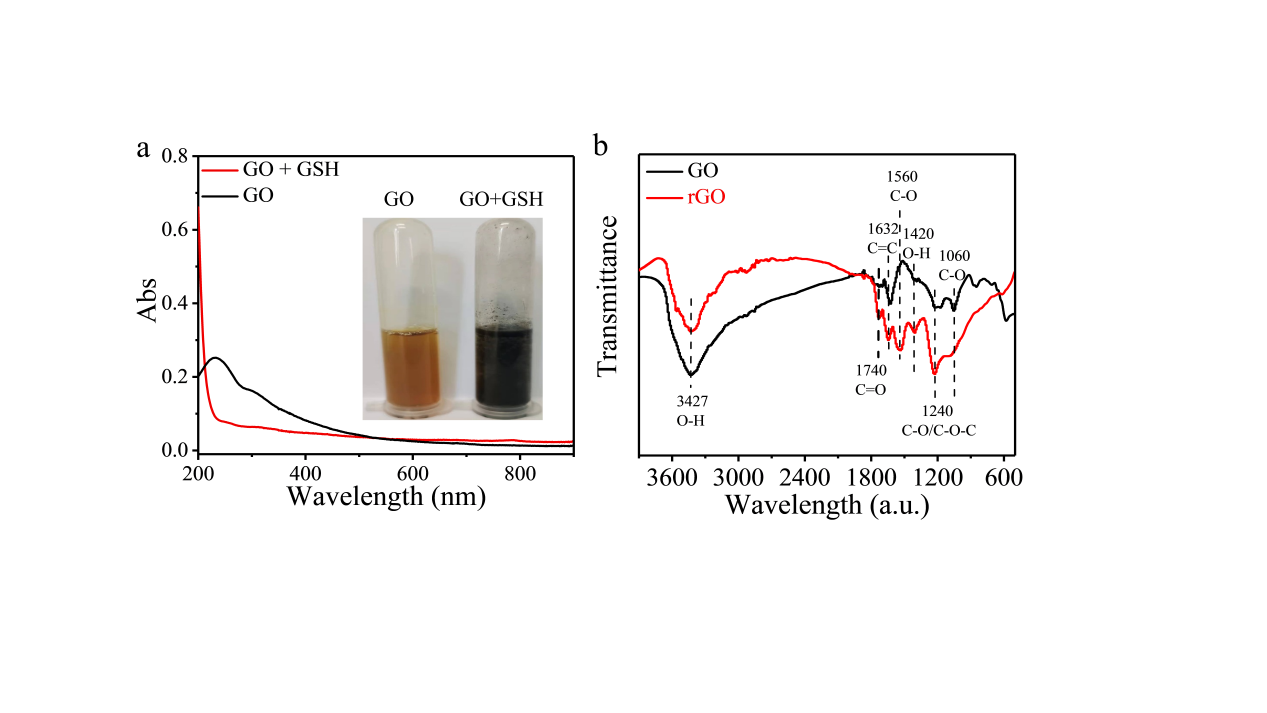
**

**Figure S5.** (a) UV absorption spectra of GO and GO+ GSH. The inset shows the corresponding photos. (b) FTIR spectra of GO and GO + GSH.

**
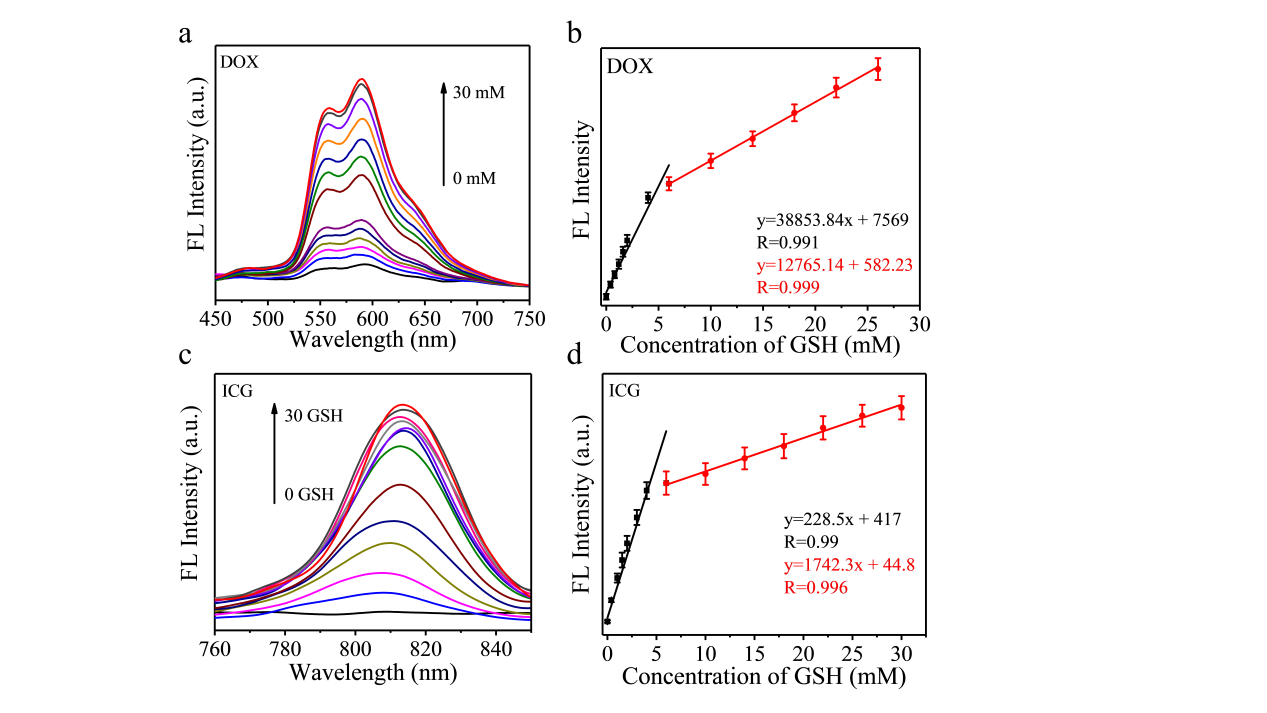
**

**Figure S6.** (a) Fluorescence spectra of DOX after FA-EM@MnO2-GO/ICG&DOX immersed into different concentrations of GSH (0-30 mM). The concentration of FA-EM@MnO2-GO/ICG&DOX is 200 μg/mL. (b) Corresponding calibration curve between the fluorescence intensity and the concentration of GSH (0-26 mM). (a) Fluorescence spectra of ICG after FA-EM@MnO2-GO/ICG&DOX immersed into different concentrations of GSH (0-30 mM). The concentration of FA-EM@MnO2-GO/ICG&DOX is 200 μg/mL. (b) Corresponding calibration curve between the fluorescence intensity and the concentration of GSH (0-26 mM).

**
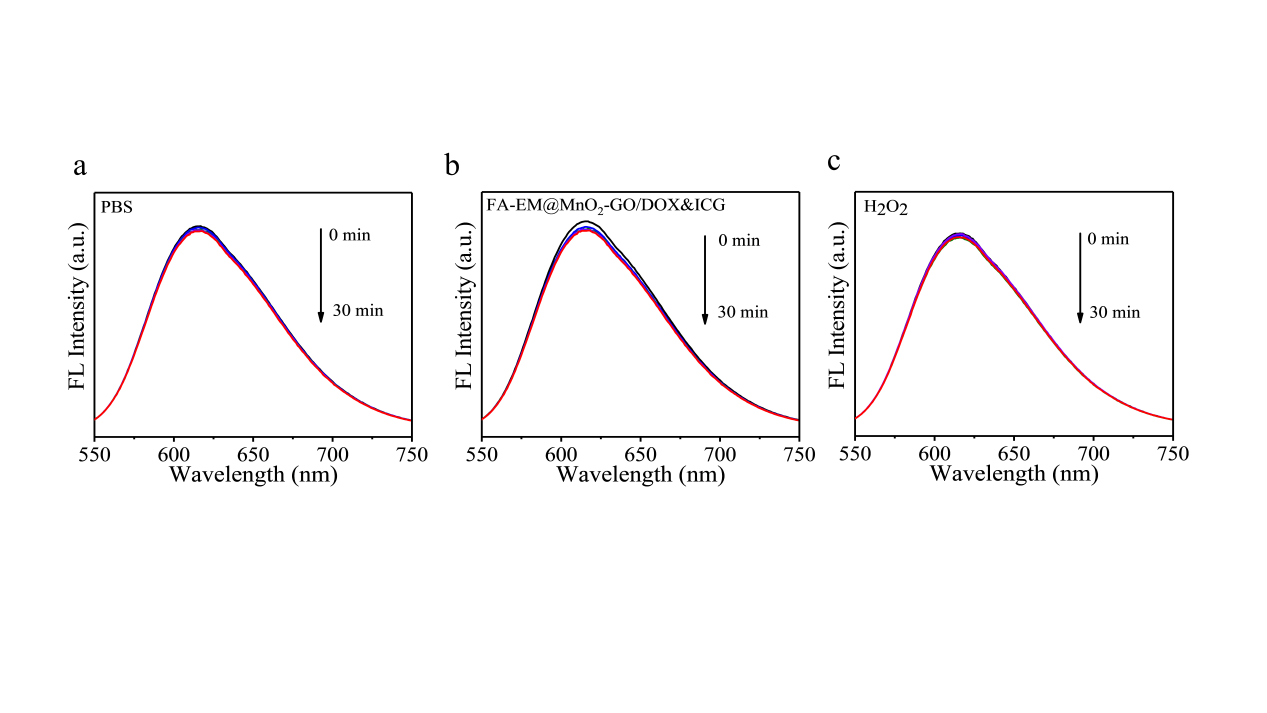
**

**Figure S7.** Fluorescence intensity of RDPP in PBS (a), FA-EM@MnO2-GO/ICG&DOX (b) and with H2O2 (c) at different time points.


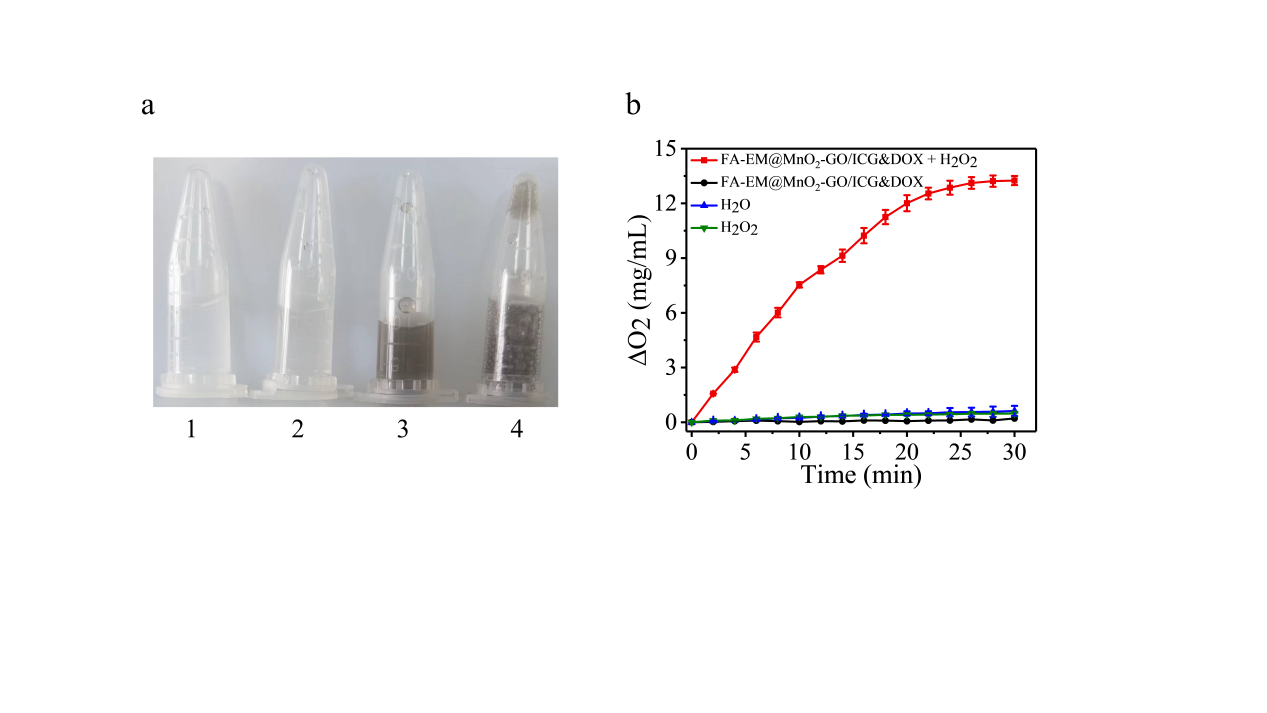


**Figure S8.** (a) Photograph of H2O2-triggered O2 generation in different solutions. (1: PBS solution; 2: H2O2 solution; 3: FA-EM@MnO2-GO/ICG&DOX solution; 4: FA-EM@MnO2-GO/ICG&DOX in H2O2 solution). (b) H2O2-triggered O2 generation in PBS solution, H2O2 solution, FA-EM@MnO2-GO/ICG&DOX solution, and FA-EM@MnO2-GO/ICG&DOX in H2O2 solution.

**
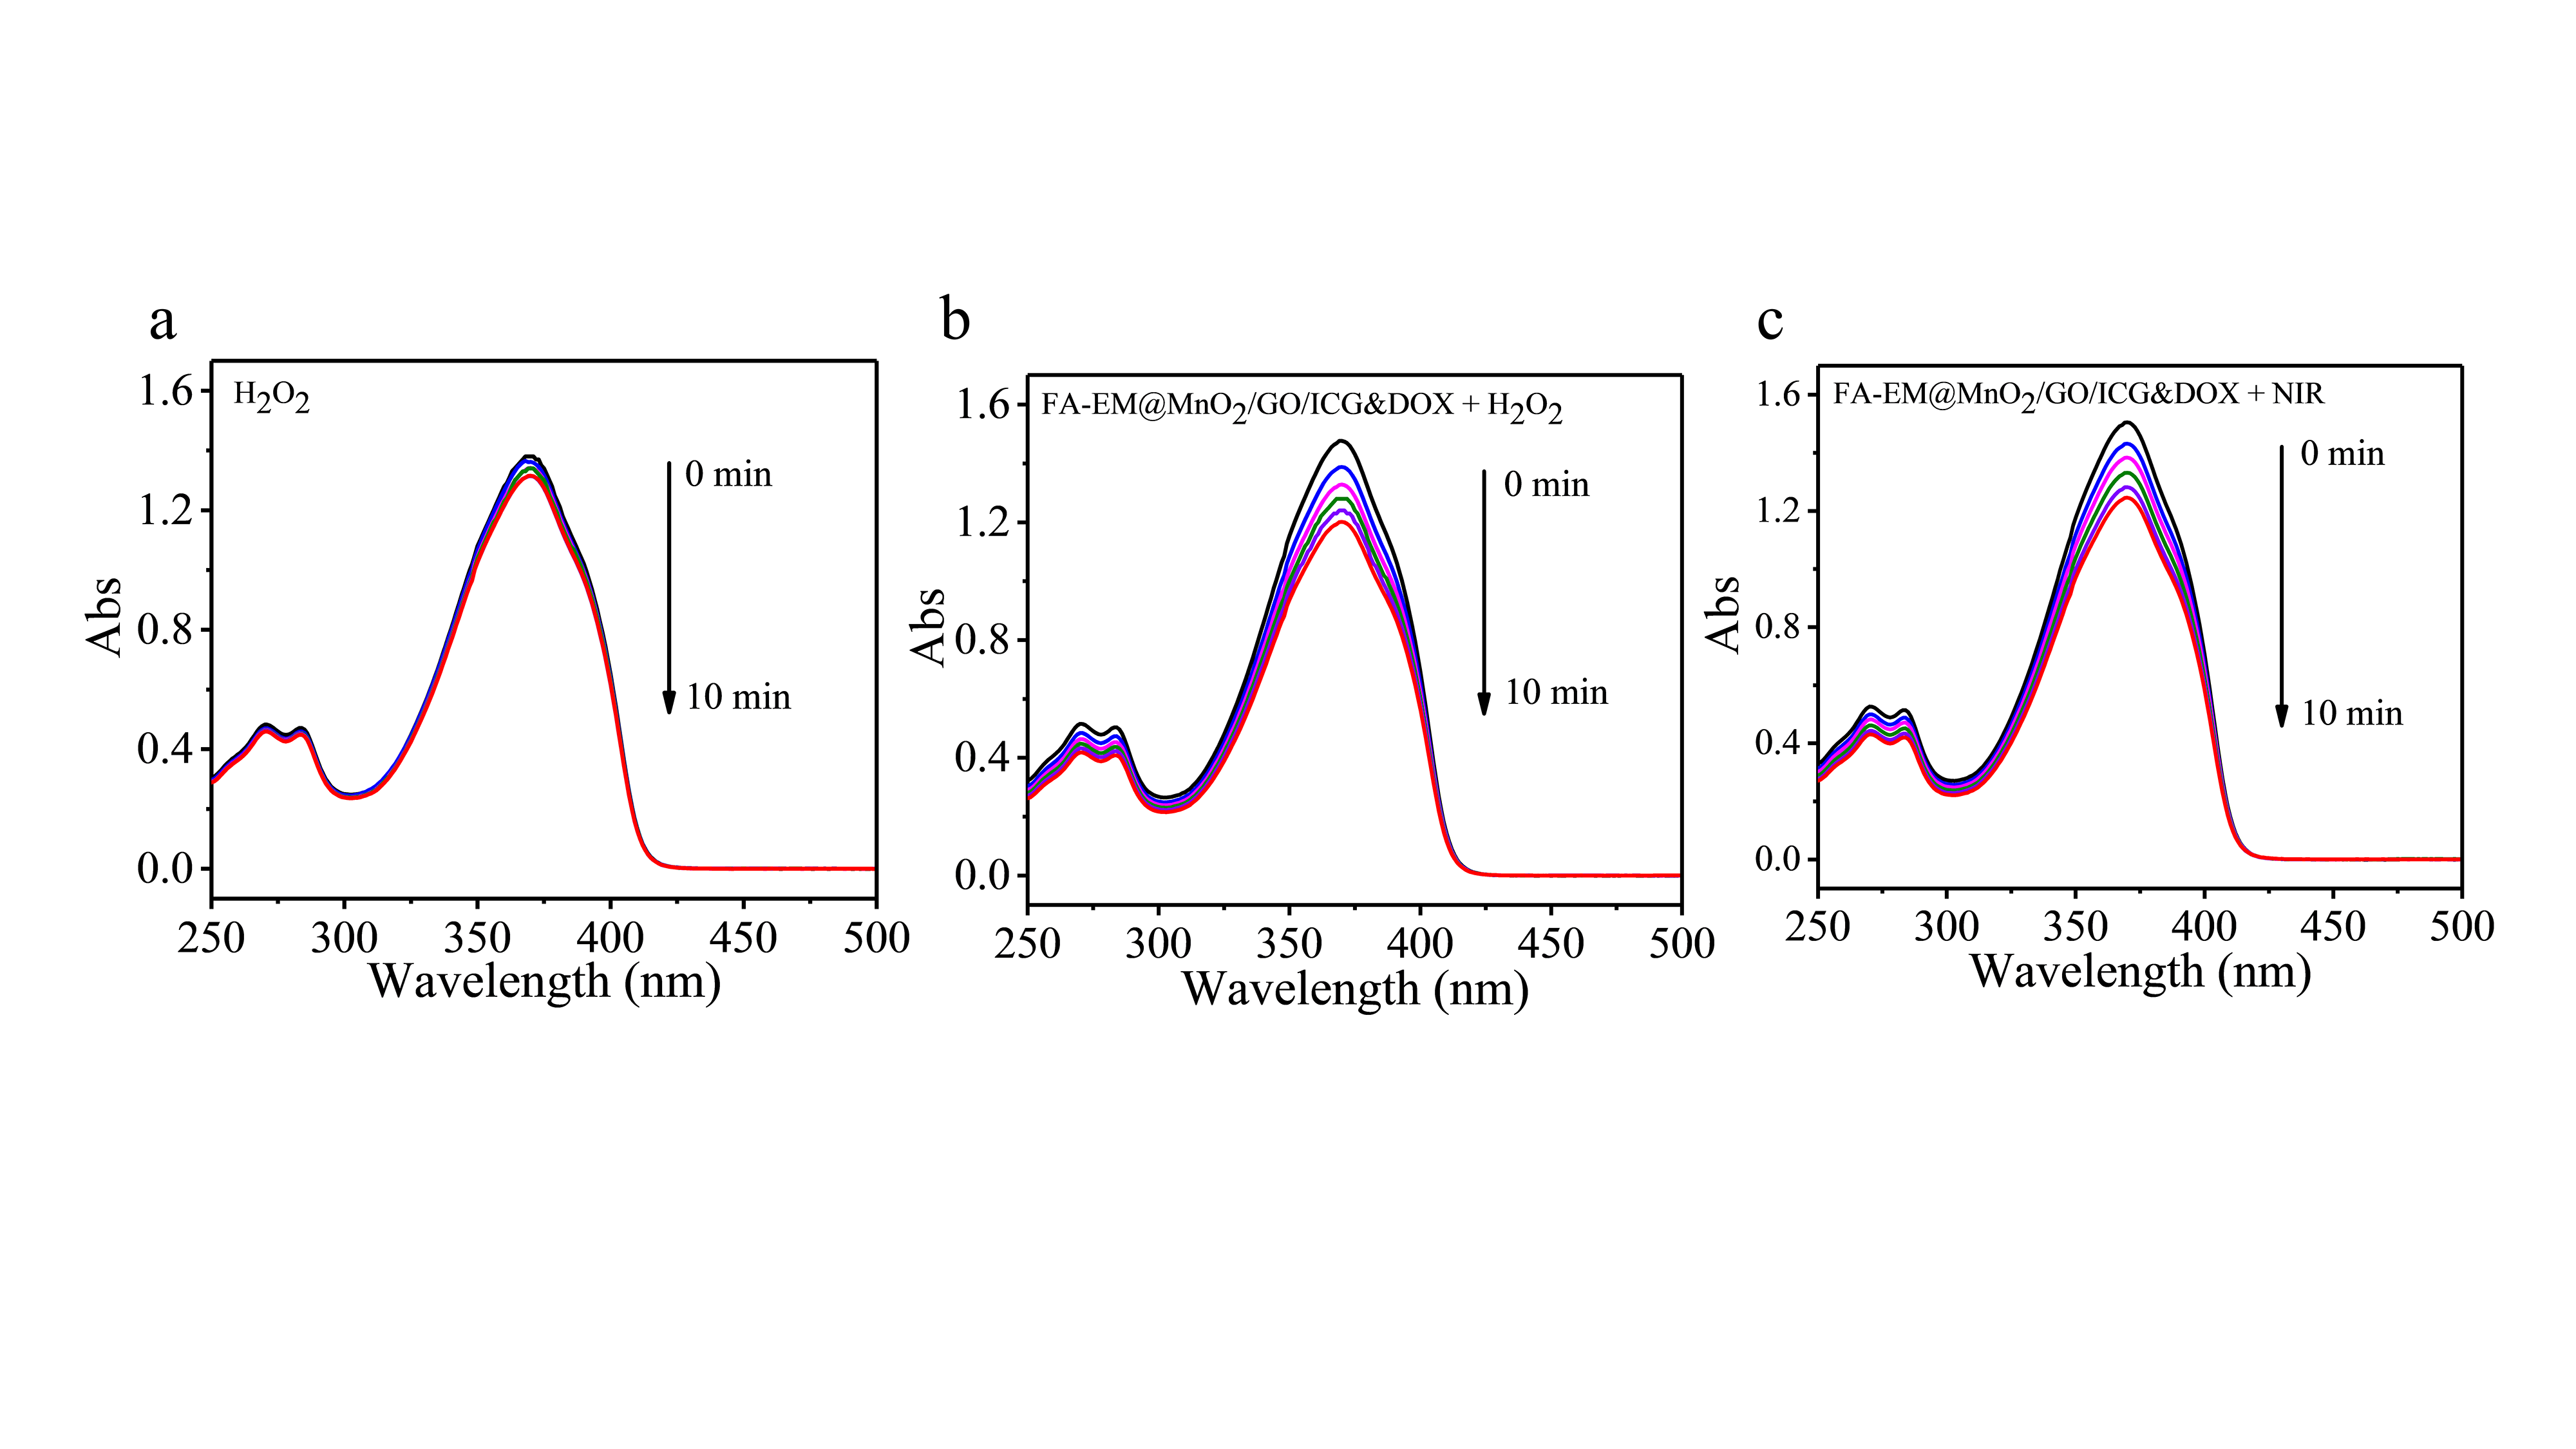
**

**Figure S9.** UV−vis absorption of DPBF in PBS containing H2O2 (a), FA-EM@MnO2-GO/ICG&DOX + H2O2 (b), and FA-EM@MnO2-GO/ICG&DOX with 808 nm laser irradiation (c) at different time points.

**
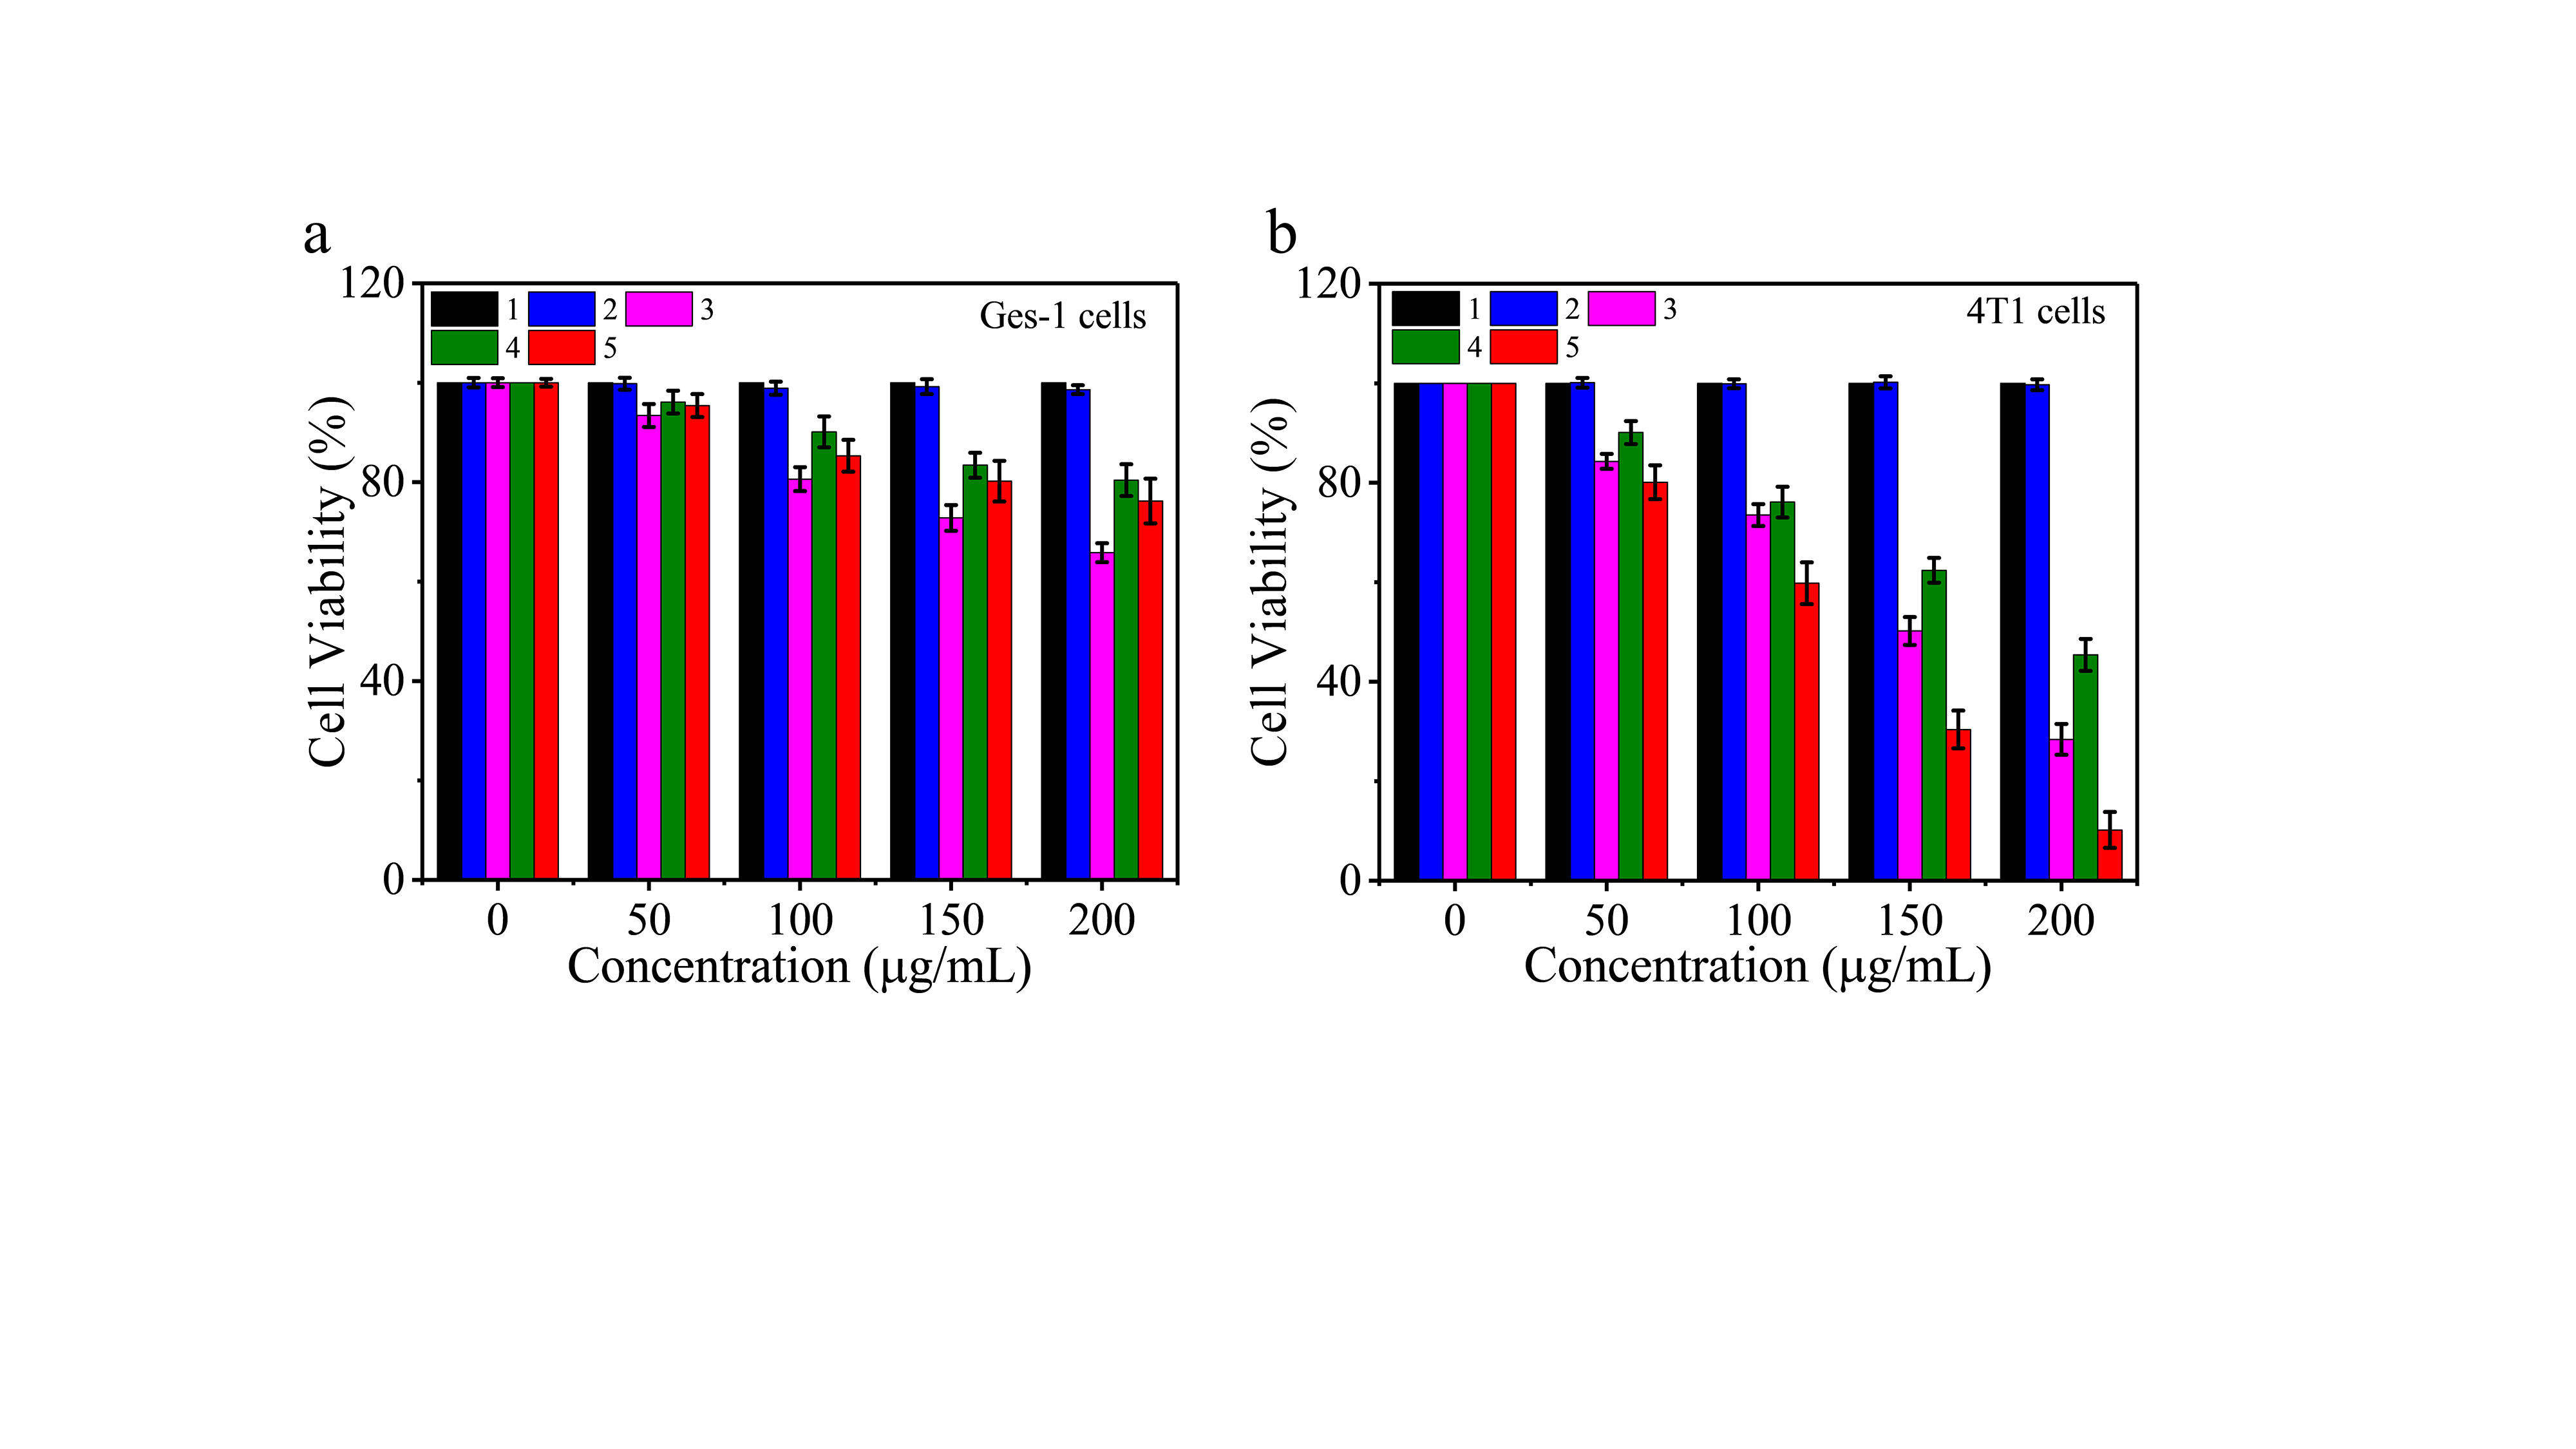
**

**Figure S10.** Viability of GES-1 cells (a) and 4T1 cells (b) upon treatment with PBS (1), PBS + NIR (2), FA-EM@ICG&DOX + NIR (3), MnO2-GO/ICG&DOX + NIR (4), FA-EM@MnO2-GO/ICG&DOX + NIR (5).


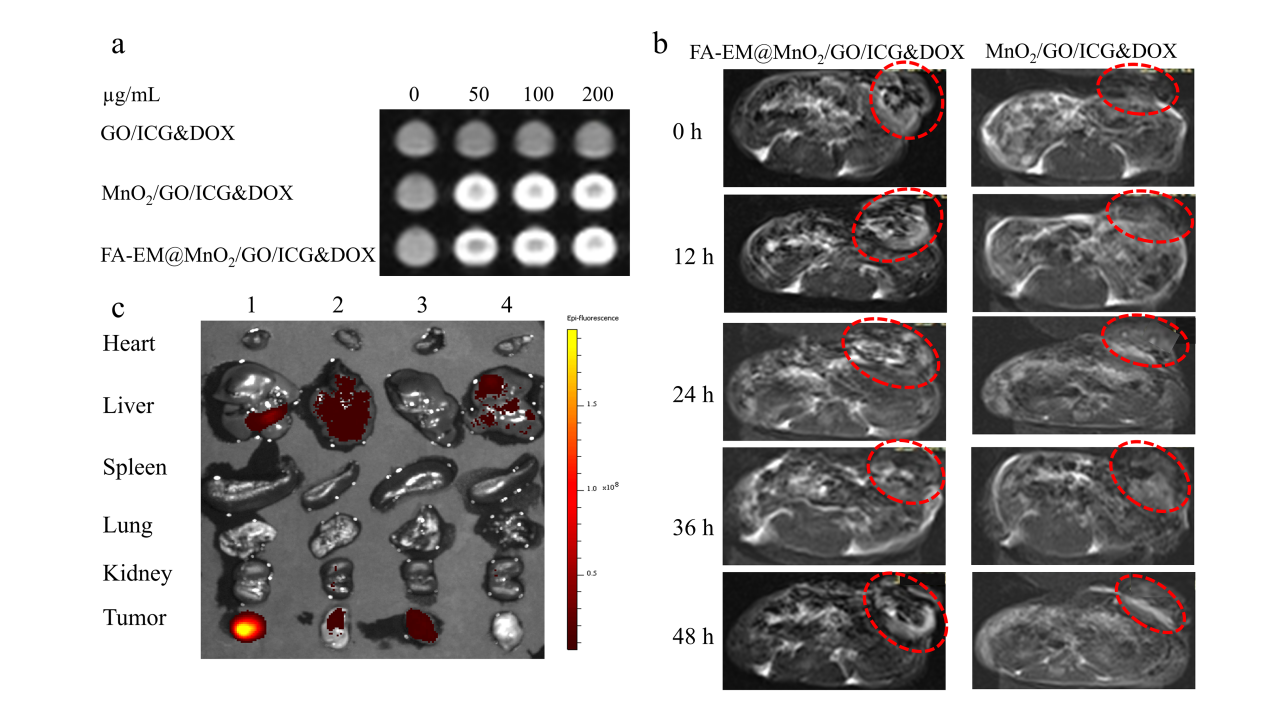


**Figure S11.** (a) The signal intensity of T1-weighted MRI for GO/ICG&DOX, MnO2/GO/ICG&DOX and FA-EM@MnO2/GO/ICG&DOX in PBS with different concentration.(b) In vivo MRI of 4T1 tumor-bearing mice at designated time intervals after injection of FA-EM@MnO2-GO/ICG&DOX and MnO2-GO/ICG&DOX. (c) Ex vivo fluorescence images of FA-EM@ICG&DOX (1), FA-EM@MnO2-GO/ICG&DOX (2), MnO2-GO/ICG&DOX (3), and PBS (4) in the heart, liver, spleen, lungs, kidneys and tumor of the 4T1 tumor-bearing mice.


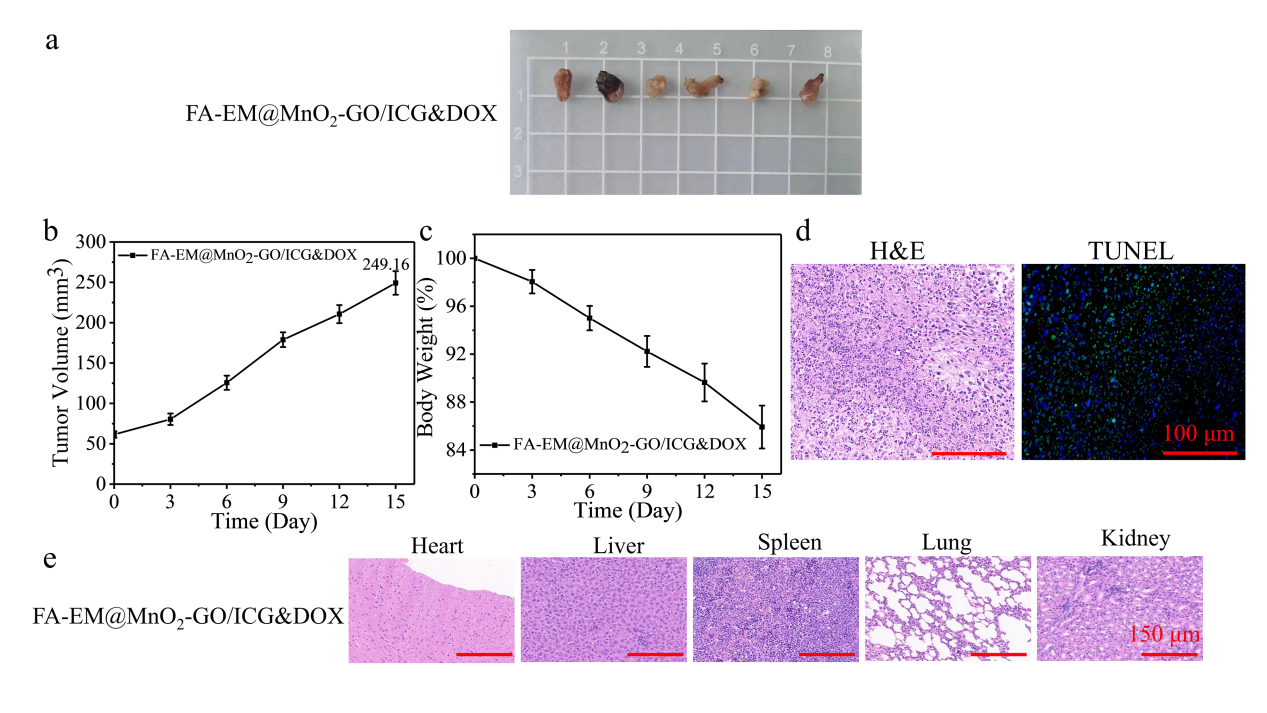


**Figure** **S12.** (a) Photographs of the tumors on day 15 post-injection after the treatment of FA-EM@MnO2-GO/ICG&DOX nanoplatform. (b) The tumor volumes on day 15 post-injection after the treatment of FA-EM@MnO2-GO/ICG&DOX nanoplatform. (c) Body weight of mice on day 15 post-injection after the treatment of FA-EM@MnO2-GO/ICG&DOX nanoplatform. (d) H&E (left) and TUNEL staining (right) of tumor slices collected from 4T1 tumor-bearing mice after treatment of FA-EM@MnO2-GO/ICG&DOX nanoplatform. (e) H&E staining of various organs collected from 4T1 tumor-bearing mice on day 15 post-injection after the treatment of FA-EM@MnO2-GO/ICG&DOX nanoplatform.


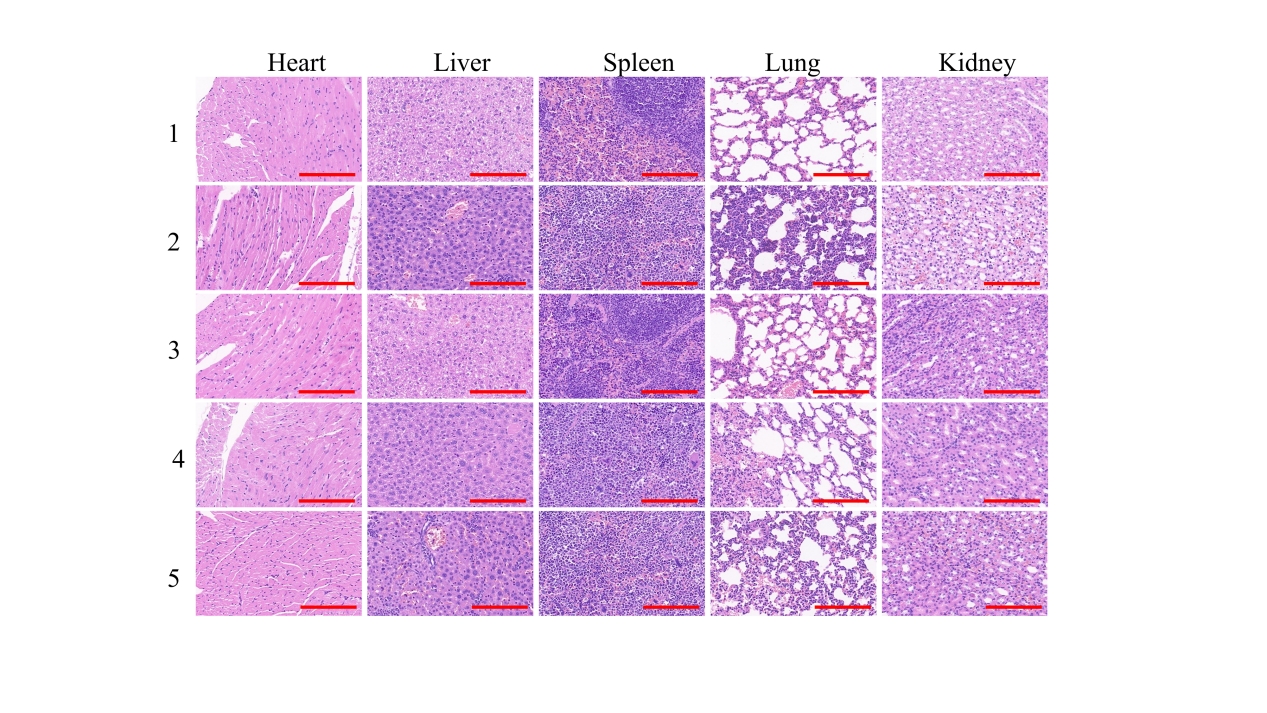


**Figure S13.** H&E staining of various organs collected from 4T1 tumor-bearing mice after different treatments of PBS (1), NIR (2), FA-EM@ICG&DOX + NIR (3), MnO2-GO/ICG&DOX + NIR (4), FA-EM@MnO2-GO/ICG&DOX + NIR (5). Scale bars: 150 μm.

**References:**

1. Min H, Wang J, Qi Y, et al. Biomimetic Metal-Organic Framework Nanoparticles for Cooperative Combination of Antiangiogenesis and Photodynamic Therapy for Enhanced Efficacy. *Adv. Mater.* 31(15): e1808200 (2019).

2. Pei W, Huang B, Chen S, et al. Platelet-Mimicking Drug Delivery Nanoparticles for Enhanced Chemo-Photothermal Therapy of Breast Cancer. *Int. J. Nanomedicine.* 15: 10151-10167 (2020).

3. Davoodi P, Lee L-Y, Xu Q, et al. Drug delivery systems for programmed and on-demand release. *Adv. Drug. Deliv. Rev.* 132: 104-138 (2018).

4. Hu X, Guan X, Li J, et al. Hybrid polymer micelles capable of cRGD targeting and pH-triggered surface charge conversion for tumor selective accumulation and promoted uptake. *Chem. Commun.* 50(65): 9188-9191 (2014).

5. Fang Z, Li X, Xu Z, et al. Hyaluronic acid-modified mesoporous silica-coated superparamagnetic Fe3O4 nanoparticles for targeted drug delivery. *Int. J. Nanomedicine.* 14: 5785-5797 (2019).
